1 **A DISTRIBUTIONAL REGRESSION APPROACH TO MODELING THE IMPACT**  
2 **OF STRUCTURAL AND INTERMEDIARY SOCIAL DETERMINANTS ON**  
3 **COMMUNITIES BURDENED BY TUBERCULOSIS IN EASTERN AMAZONIA –**  
4 **BRAZIL**

5  
6 Authors:

7 Clóvis Luciano Giacomet<sup>1</sup>, Antônio Carlos Vieira Ramos<sup>2</sup>, Heriederson Sávio Dias Moura<sup>2</sup>,  
8 Thaís Zamboni Berra<sup>2</sup>, Yan Mathias Alves<sup>2</sup>, Felipe Mendes Delpino<sup>2,3</sup>, Jason E. Farley<sup>4</sup>, Nancy  
9 R. Reynolds<sup>4</sup>, Jonas Bodini Alonso<sup>5</sup>, Titilade Kehinde Ayandeyi Teibo<sup>2</sup>, Ricardo Alexandre  
10 Arcêncio<sup>6\*</sup>

11  
12 <sup>1</sup>Interunits PhD Program in Nursing, University of São Paulo College of Nursing at Ribeirão  
13 Preto, Ribeirão Preto, Brazil

14 <sup>2</sup>Graduate Program in Public Health Nursing, University of São Paulo College of Nursing at  
15 Ribeirão Preto, Ribeirão Preto, Brazil

16 <sup>3</sup>Postgraduate Program in Nursing, Federal University of Pelotas, Pelotas, Brazil

17 <sup>4</sup>The Center for Infectious Disease and Nursing Innovation, Johns Hopkins School of  
18 Nursing, Baltimore, United States of America

19 <sup>5</sup>Research Support Center, University of São Paulo College of Nursing at Ribeirão Preto,  
20 Ribeirão Preto, Brazil

21 <sup>6</sup>Department of Maternal and Child Nursing and Public Health, University of São Paulo  
22 College of Nursing at Ribeirão Preto, Ribeirão Preto, Brazil

23

24 \*Corresponding author

25 Email: [ricardo@ernp.usp.br](mailto:ricardo@ernp.usp.br)  
Note: This preprint reports new research that has not been certified by peer review and should not be used to guide clinical practice.

26 **ABSTRACT**

27 **Background:** TB is a disease affected by social determinants of health; however, it is unclear  
28 what its structural and intermediary determinants are in Eastern Amazonia. The region contains  
29 many natural resources, yet it suffers drastically from poverty, inequality, and neglected  
30 diseases. Here, we aimed to employ mathematical modeling to evaluate the influence of  
31 structural and intermediary determinants of health on TB in Eastern Amazonia – Brazil.

32 **Methods:** We conducted an ecological study. We considered cases diagnosed of TB and  
33 collected data by census tract to measure the social determinants. We applied the *generalized*  
34 *additive model for location, scale, and shape* (GAMLSS) framework to identify the effect of  
35 social determinants on communities with a high prevalence of TB. The Double Poisson  
36 distribution (DPO) was selected and we tested the inclusion of quadratic effects.

37 **Results:** 1,730 people were selected. The majority were female (59.3%), aged 31 to 59 years  
38 (47.6%), blacks (67.9%), schooling level of 5 to 8 years (18.7%). Prevalence of alcoholism  
39 was 8.6% and mental illness 0.7%. The GAMLSS analyses showed that the risk of community  
40 incidence of TB is associated with the proportion of the population without basic sanitation  
41 and also with the age groups 16-31 years and > 61 years.

42 **Conclusions:** The study revealed that GAMLSS is a strategic tool to identify territories at  
43 greatest risk for TB. Models should have broader scope to include social determinants so as to  
44 better inform policy to reduce inequality and achieving the goal of the End TB strategy.

## 45 INTRODUCTION

46 Brazil is among the countries with the highest tuberculosis (TB) burden[1]. According  
47 to the latest report from the World Health Organization (WHO), Brazil identified more than  
48 66,819 cases in 2020. This shows a decrease of 18% compared with data from the year 2019,  
49 but at the same time, there was an increase in TB-related mortality[1].

50 Although Brazil has committed to ending TB by 2050, the country has faced enormous  
51 challenges in achieving this ambitious goal. This is largely due to austerity measures that have  
52 cut social benefits to lower socio-economic groups as well as to a serious economic crisis  
53 brought on by the pandemic and government policies[2]. According to forecast models, the  
54 TB targets of the UN Sustainable Development Goals (SDGs) (which aims for a 90% reduction  
55 in TB deaths by 2030) are not likely to be achieved.

56 There is a broad agreement that progress in tuberculosis control will require not only  
57 investment in strengthening tuberculosis control programs, diagnostics, and treatment, but also  
58 action on the Social and structural Determinants of TB. The Structural factors include  
59 governing action, economic and social policies, and the position of power, prestige, and  
60 resources in accordance with the social level occupied by an individual, family, or  
61 community[3]. Intermediary determinants consist of material circumstances, psychosocial  
62 behavior, biological factors, and the health system[3]. Literature is replete with evidence of  
63 their influence in the context of TB,[4-9] but are without making distinctions on the dimensions  
64 of these determinants.

65 Mathematical modelling can be useful in exploring the contribution of health drivers to  
66 face the epidemic and browse through evidences to End TB strategies. However, current TB  
67 models have limitations, for example, a systematic review conducted by Pedrazzoli and  
68 colleagues showed that that few studies employing mathematical modeling have addressed  
69 underlying Social and Structural determinants, which makes this a knowledge gap[4].

70 Although many mathematical models have been used for forecasting TB, most of them tended  
71 to ignore the differences in variance and its asymmetry/imbalance and they retain almost  
72 exclusively the mean for explaining the outcome[10], which has revealed an important gap in  
73 knowledge.

74 Studies have provided results that are more satisfactory when alternative regressions  
75 techniques are applied. Generalized additive models for location, scale, and shape (GAMLSS)  
76 has allowed a more expanded approach where it worked with not only the mean (or location)  
77 but also all the parameters of the conditional distribution of outcome to be modeled as  
78 parametric/or nonparametric additive functions of independent variables and/or random-effects  
79 terms[11,12]. Therefore, here, we aimed to employ mathematical modeling to evaluate the  
80 impact of structural and intermediary social determinants on TB in Eastern Amazonia – Brazil.

81

## 82 **METHODS**

### 83 **Study design**

84 We used an ecological, mathematical modeling study design.

85

### 86 **The setting of the study**

87 We conducted the study in Macapá, the capital of Amapá state, Eastern Amazonia (Fig  
88 1). It has a population of about 398,204 inhabitants, and a demography density near 62.14  
89 people per km<sup>2</sup>. It is the most populous city in Northern Amazonas State.

90

### 91 **Fig 1. Map of the study setting.**

92

93 Regarding TB, the city presented an incidence of 17.5 cases per 100,000 in 2020, which  
94 represented a decrease of 25% compared to the previous year's data[13]. A problematic

95 situation is that only 39.3% of the patients diagnosed with TB had confirmation from the  
96 bacteriological analysis (microscopy or GeneXpert MTB/RIF), and 47.3% did not have  
97 confirmation of the diagnosis of TB through a bacteriological test[14].

98

### 99 **The population of the study and criteria**

100 The population was composed of all the cases diagnosed with tuberculosis and registered  
101 in the Notification of Notifiable Diseases System (SINAN) in the period from 2001 to 2017.  
102 We gathered socio-demographic data (age, gender, race/ color self-reported and years of study  
103 and occupation) and clinical information (type of case – new or retreatment; clinical form –  
104 pulmonary or extrapulmonary; coinfection with TB-HIV; alcoholism; mental disorders;  
105 comorbid TB-diabetes).

106 In accordance with the WHO guidelines, the diagnosis of TB refers to the recognition of  
107 an active case when a patient with *Mycobacterium tuberculosis complex* is identified from a  
108 clinical specimen, either by microscopy, culture, or a newer method such as a molecular line  
109 probe assay[15]. In Brazil, a pulmonary case with one or more initial sputum smear  
110 examinations positive for acid-fast bacilli (AFB) is also defined as a "case"[16]. Eventually,  
111 the diagnosis can be established only through clinical examination by a physician and X-ray;  
112 however, it is not recommended by the Brazilian sanitary authorities. New patients are defined  
113 as those who have no history of prior TB treatment or who have been treated for at least/ less  
114 one month. These cases should receive a regimen containing six months of rifampicin:  
115 2HRZE/4HR[16].

116

### 117 **Unity of study analysis and variables**

118 The unit of study analysis was 811 Urban Census Tract (UCT) contained in Macapá,  
119 collected from the Brazilian Institute of Geography and Statistics (IBGE). The UCT consists

120 of the smallest territorial unit formed by a continuous area located in an urban area, with a  
121 defined size, number of households, and number of residents, used for Brazilian surveys and  
122 statistical research[17]. The information regarding UCT was obtained from the 2010 Brazilian  
123 Demographic Census, which collected data regarding both structural and intermediary  
124 determinants expressed by household conditions and characteristics of the territories (UCT). In  
125 Fig 2 is shown the variable under study.

126

127 **Fig 2. Structural and intermediary determinants selected for the study, Eastern**  
128 **Amazonia – Brazil.**

129

### 130 **Analysis plan**

131 Initially, the variables were analyzed by descriptive statistics. Additionally, for  
132 identifying the structural and intermediary determinants associated with TB, we used the model  
133 GAMLSS[11]. The reason for applying this model is because the modeling of the response  
134 variable (TB cases) did not follow a distribution of exponential family, and it showed  
135 heterogeneity in terms of distribution scale and shape. The response variable changed with the  
136 explanatory variables[19].

137 Since  $y^T = (y_1, \dots, y_n)$  is a vector of size n of the response variable with density function  
138  $f(y_i|\theta^i)$ , where  $\theta^i = (\theta_{1i}, \theta_{2i}, \theta_{3i}, \theta_{4i}) = (\mu_i, \sigma_i, \nu_i, \tau_i)$ , and let  $k = 1, 2, 3, 4$  e let  $g_k(\cdot)$  a monotone  
139 link function that relates the parameters to the independent variables from the equations:

$$\left\{ \begin{array}{l} g_1(\mu) = n_1 = X_1\beta_1 + \sum_{j=1}^{J_1} Z_{j1}\gamma_{j1}, \\ g_2(\sigma) = n_2 = X_2\beta_2 + \sum_{j=1}^{J_2} Z_{j2}\gamma_{j2}, \\ g_3(\nu) = n_3 = X_3\beta_3 + \sum_{j=1}^{J_3} Z_{j3}\gamma_{j3}, \\ g_4(\tau) = n_4 = X_4\beta_4 + \sum_{j=1}^{J_4} Z_{j4}\gamma_{j4}. \end{array} \right.$$

140

141 Where  $\mu, \sigma, v \in \tau$  are vectors of length  $n$ ,  $\beta_k = (\beta_{1k}, \beta_{2k}, \dots, \beta_{jk})$  is a vector of length  $j^k$   
142  $eX_k$  is the delineation matrix of order  $n \times j^k$ . The function  $h_{jk}$

143 Non additive function of the independent variable  $X_k$  evaluated at  $x_{jk}$ .

144 The selection of the dependent variable distribution was performed using the  
145 Generalized Akaike information criterion, defined by  $GAIC = -2l(\hat{\theta}) + bdf$ , where  $l(\hat{\theta})$  the  
146 likelihood function,  $b$  is a penalty parameter, and  $df$  denotes the degrees of freedom of the  
147 model[20]. For  $b = 2$  we have the original Akaike information criterion (AIC). According to  
148 literature[21] all distributions falling in the GAMLSS class are presented.

149 The selection of the independent variables was made in 2 steps. In the first step, the  
150 presence of multicollinearity among the independent variables was evaluated. The  
151 multicollinearity assessment evaluates the entry of variables in the model that are highly  
152 correlated with each other. One of the most used measures is the Variance Inflation Factor,  
153 whose expression is defined by:

154 
$$VIF_j = \frac{1}{1 - R_j^2}$$

155 Where  $R_j^2$  is the multiple correlation coefficient resulting from regressing  $X_j$  on the other  
156  $p - 1$  regressor. The higher the degree of dependence of  $X_j$  on the remaining regressors, the  
157 stronger the dependence and the higher the value of  $R_j^2$ . A VIF value  $> 5$  was adopted as the  
158 cutoff point[12,22]. Since the independent variables are the same for both outcomes, the result  
159 of this analysis is also considered valid for both.

160 Additionally, we applied the stepwise method using the Generalized Akaike  
161 Information Criterion (GAIC) with  $k = 4$ [12] for the remaining variables from the first stage.  
162 After this analysis, The Double Poisson distribution (DPO) was selected in accordance with  
163 the AIC value (Table 3), where DPO ( $\mu, \sigma$ ) has the following probability density function[21].

164 
$$f(y|\mu, \sigma) = \left(\frac{1}{\sigma}\right)^{\frac{1}{2}} e^{-\frac{\mu}{\sigma}} \left(\frac{e^{-y} y^y}{y!}\right) \left(\frac{e\mu}{y}\right)^{y/\sigma} C$$

165 Where  $y = 0, 1, 2, \dots, \infty$ ,  $\mu > 0$  and  $\sigma > 0$ , where C is a proportionality constant that is  
 166 calculated numerically. The link function between the parameters and the independent  
 167 variables is the log function, i.e.,  $g_1(\mu) = \log(\mu)$  and  $g_2(\sigma) = \log(\sigma)$ [21].

168 We verified the model's adequacy through the model's diagnostic graphics: Fitted  
 169 Values x Residuals, Order of Observations x Residuals, Distribution of Residuals, and the  
 170 Quantile-Quantile plot (Q-Q plot). Additionally, the Shapiro-Wilk Normality test was applied  
 171 to the model's residuals to verify if they are fit with the Standard Normal distribution. We  
 172 considered the dependent variable, the number of TB cases in each UCT, and the structural and  
 173 intermediary determinants indicators as the independent variables (Table 1). These variable/  
 174 proxy indicators were selected in accordance with the theoretical framework defined in the  
 175 study[4, 19].

176

177 **Table 1. Socio-demographic and clinical-epidemiological profile of Tuberculosis cases,**  
 178 **Eastern Amazonia (Brazil).**

| <b>Variables</b>             | <b>N=1,730 (%)</b> |
|------------------------------|--------------------|
| Age (years)                  |                    |
| 0 to 14 years                | 74 (4.3)           |
| 15 to 30 years old           | 640 (37.0)         |
| 31 to 59 years               | 823 (47.6)         |
| Above 60 years old           | 175 (10.1)         |
| Blank/Ignored                | 18 (1.0)           |
| Gender                       |                    |
| Male                         | 704 (40,7)         |
| Female                       | 1026 (59,3)        |
| Years of study               |                    |
| Illiterate                   | 128 (7.4)          |
| Elementary school complete   | 112 (6.5)          |
| Elementary School Incomplete | 803 (46.6)         |
| High School Complete         | 224 (12.9)         |
| Higher Education Incomplete  | 52 (3.0)           |
| Higher education complete    | 127 (7.3)          |
| Blank/Ignored                | 284 (16.4)         |
| Registration types           |                    |
| New                          | 682 (39.4)         |
| Relapse                      | 9 (0.5)            |



|                               |              |
|-------------------------------|--------------|
| Retreatment after abandonment | 0 (0.0)      |
| Retreatment                   | 1 (0.1)      |
| Transfer                      | 1 (0.1)      |
| After death                   | 26 (1.5)     |
| Blank/Unknown                 | 1.011 (58.4) |
| Clinic form                   |              |
| Extrapulmonary                | 236 (13.6)   |
| Pulmonary                     | 1472 (85.1)  |
| Pulmonary + Extrapulmonary    | 18 (1.0)     |
| Blank/Ignored                 | 4 (0.3)      |
| Coinfection TB-HIV            |              |
| No                            | 787 (45.5)   |
| Yes                           | 77 (4.5)     |
| Blank/Ignored                 | 866 (50.0)   |
| Coinfection TB-Diabetes       |              |
| No                            | 912 (52.8)   |
| Yes                           | 94 (5.4)     |
| Blank/ Ignored                | 724 (41,8)   |
| Alcoholism                    |              |
| No                            | 896 (51.7)   |
| Yes                           | 148 (8.6)    |
| Blank/ Ignored                | 686 (39.7)   |
| Mental Disorders              |              |
| No                            | 1001 (57.8)  |
| Yes                           | 12 (0.7)     |
| Blank/Ignored                 | 717 (41.5)   |

179

180 We performed the GAIC selection of the independent variables considering only the  
 181 linear effects. Additionally, we tested the inclusion of quadratic effects since in the scatter plots,  
 182 the fitted curve (by the loess method = local polynomial regression) evidenced a possible  
 183 quadratic relationship. To compare the two models, linear terms versus quadratic terms, we  
 184 used the Likelihood Ratio Test (LR). Once we selected the fittest model, we estimated the  
 185 Relative Increase, expressed in percentage, in the Average Number of Tuberculosis Cases  
 186 through the expression  $AR(\beta) = [\exp(\beta) - 1] * 100\%$ . The R program version 4.1.1 through  
 187 the GAMLSS library[23] was used to perform the data analysis for this part.

188

189 **Ethics approval and consent to participate**

190 In compliance with Resolution 499/2012 of the National Health Council in Brazil, the  
191 study was authorized by the Municipal Health Secretariat of Macapá- Brazil and approved by  
192 the Research Ethics Committee from the University of São Paulo College of Nursing at  
193 Ribeirão Preto, which had the Certificate of Submission for Ethics Appreciation (CAAE)  
194 Number. 23043019.2.0000.5393. Consent to participate not applicable, because we work with  
195 secondary data. All participant identifiers were removed.

196

## 197 **RESULTS**

198 We identified 1,730 patients diagnosed with TB. Table 1 shows the main characteristics  
199 of the patients, in which is observed an age ranging from 1 to 89 years (median = 44.5 years).  
200 Most were female (59.3%), aged 31 to 59 years (47.6%), blacks (67.9%), and with an education  
201 level of 5 to 8 incomplete years (18.7%). In terms of the clinical and epidemiological profile,  
202 cases were mostly characterized as new (39.4%) and pulmonary (85.1%) TB. Regarding  
203 comorbidities, we observed a TB-HIV prevalence of 4.5%; TB-Diabetes of 5.4%; Alcoholism  
204 at 8.6%; and mental illness at 0.7%. We observed an excess of cases numbers with ignored or  
205 blank data.

206 In Fig 3, evidences the spatial distribution of TB cases, considering the comorbid or  
207 health condition: TB-HIV coinfection mental disorder, diabetes or alcoholism.

208

### 209 **Fig 3. Spatial distribution of tuberculosis in the study, Eastern Amazonia.**

210

211 In Table 2, we presented the main information obtained from the descriptive statistics.  
212 For the dependent variable, we considered the total of cases and the independents (proxy  
213 variables of structural and intermediary social determinants) the proportion of households in  
214 each UCT under those conditions characterized by the variable.

215 **Table 2. Statistics descriptive of the variables defined in the study, Eastern Amazonia.**

216

| <b>Variables</b>                                                                                                                                   | <b>Mean</b> | <b>Standard Deviation</b> | <b>Minimum</b> | <b>Q0.25</b> | <b>Q0.5</b> | <b>Q0.75</b> | <b>Maximum</b> |
|----------------------------------------------------------------------------------------------------------------------------------------------------|-------------|---------------------------|----------------|--------------|-------------|--------------|----------------|
| Cases of TB per UCT *                                                                                                                              | 3.43        | 3.00                      | 0.00           | 1.00         | 3.00        | 5.00         | 23.00          |
| v1 Proportion of households with 1 to 3 people                                                                                                     | 42.32       | 7.56                      | 19.15          | 37.77        | 42.21       | 47.19        | 76.81          |
| v2 Proportion of households with 4 to 6 people                                                                                                     | 43.79       | 5.42                      | 15.94          | 40.70        | 43.81       | 47.34        | 56.52          |
| v3 Proportion of households with 7 to 9 people                                                                                                     | 10.82       | 4.07                      | 0.00           | 8.28         | 10.17       | 12.86        | 29.79          |
| v4 Proportion of households with higher than 10 people                                                                                             | 3.08        | 2.19                      | 0.00           | 1.60         | 2.70        | 4.04         | 14.89          |
| v5 Proportion of males without schooling                                                                                                           | 18.33       | 7.28                      | 3.28           | 13.09        | 17.60       | 22.73        | 44.06          |
| v6 Proportion of females without schooling                                                                                                         | 17.14       | 6.82                      | 2.33           | 12.33        | 16.12       | 21.38        | 43.90          |
| v7 Proportion of own and paid-up domiciles                                                                                                         | 76.05       | 12.20                     | 17.55          | 69.28        | 77.94       | 84.40        | 100.00         |
| v8 Proportion of rented dwellings                                                                                                                  | 16.70       | 9.72                      | 0.00           | 9.45         | 15.32       | 22.65        | 67.11          |
| v9 Proportion of domiciles in another property' condition (not owned, rented, and not granted)                                                     | 0.19        | 0.67                      | 0.00           | 0.00         | 0.00        | 0.00         | 10.20          |
| v10 Proportion of households with a bathroom for exclusive use by residents or a toilet and drainage in a general sewage or rainwater network      | 65.63       | 14.40                     | 9.09           | 56.64        | 65.60       | 75.00        | 100.00         |
| v11 Proportion of houses without a bathroom for the exclusive use of residents or toilet                                                           | 1.11        | 1.86                      | 0.00           | 0.00         | 0.36        | 1.48         | 12.00          |
| v12 Permanent particular residences with water supply from the general network                                                                     | 59.39       | 36.91                     | 0.00           | 22.02        | 70.27       | 94.16        | 100.00         |
| v13 Permanent particular residences with water supply from wells or springs on the property                                                        | 36.73       | 34.79                     | 0.00           | 4.49         | 25.65       | 70.83        | 100.00         |
| v14 Permanent Particular Domiciles with Another Form of Water Supply                                                                               | 3.28        | 7.78                      | 0.00           | 0.00         | 0.80        | 2.88         | 82.50          |
| v15 Permanent private households with a bathroom exclusively for residents or sanitary                                                             | 98.29       | 4.36                      | 22.33          | 97.89        | 99.32       | 100.00       | 100.00         |
| v16 Permanent private households with exclusive use of bathroom or toilet and sanitary sewage via the general sewage network or rainwater drainage | 10.06       | 21.83                     | 0.00           | 0.00         | 1.06        | 5.27         | 98.90          |

|                                                                                                                                                   |       |       |       |       |       |       |        |
|---------------------------------------------------------------------------------------------------------------------------------------------------|-------|-------|-------|-------|-------|-------|--------|
| v17 Permanent private households with a bathroom for exclusive use by the residents or a toilet and sanitary sewage via a septic tank             | 18.73 | 26.59 | 0.00  | 0.88  | 6.02  | 25.09 | 100.00 |
| v18 Permanent private households with a bathroom for exclusive use by the residents or a toilet and sanitary sewage via a rudimentary septic tank | 49.23 | 33.94 | 0.00  | 14.18 | 54.88 | 81.91 | 99.36  |
| v19 Permanent private households with a bathroom for exclusive use by the residents or a toilet and sewage via river, lake, or sea                | 17.28 | 28.16 | 0.00  | 0.00  | 1.09  | 21.06 | 100.00 |
| v20 Proportion of households with no nominal monthly income per capita                                                                            | 4.07  | 4.83  | 0.00  | 1.31  | 2.68  | 5.06  | 38.64  |
| v21 Proportion of households with per capita nominal monthly income of up to 1/8 to 1 minimum wage                                                | 58.02 | 20.22 | 7.63  | 43.61 | 60.00 | 73.71 | 96.09  |
| v22 Proportion of households with a nominal monthly per capita income of more than 1 to 2 minimum wages                                           | 18.82 | 7.02  | 2.61  | 13.28 | 20.19 | 24.24 | 38.94  |
| v23 Proportion of domiciles with nominal monthly income per capita of more than 2 to 3 minimum wages                                              | 7.75  | 5.63  | 0.00  | 3.14  | 6.85  | 11.41 | 36.36  |
| v24 Proportion of households with a nominal monthly income per capita of more than 3 to 5 minimum wages                                           | 6.47  | 5.70  | 0.00  | 1.64  | 5.00  | 10.21 | 24.29  |
| v25 Proportion of households with a nominal monthly income per capita of more than 5 to 10 minimum wages                                          | 3.93  | 4.57  | 0.00  | 0.71  | 2.24  | 5.55  | 23.25  |
| v26 Proportion of households with nominal monthly income per capita higher than 10 minimum wages                                                  | 1.20  | 2.05  | 0.00  | 0.00  | 0.42  | 1.42  |        |
| v27 Proportion of resident people of white race or ethnicity                                                                                      | 27.10 | 6.51  | 5.88  | 23.31 | 26.96 | 30.70 | 14.12  |
| v28 Proportion of black residents                                                                                                                 | 9.18  | 5.49  | 0.00  | 5.63  | 8.57  | 11.57 | 52.63  |
| v29 Proportion of resident people of yellow race or ethnicity                                                                                     | 1.19  | 1.34  | 0.00  | 0.26  | 0.80  | 1.80  | 39.60  |
| v30 Proportion of resident people of mixed race or ethnicity                                                                                      | 62.34 | 8.35  | 31.15 | 57.59 | 61.96 | 67.50 | 94.12  |
| v31 Proportion of resident people of indigenous race or ethnicity                                                                                 | 0.20  | 0.51  | 0.00  | 0.00  | 0.00  | 0.16  |        |

|                                                   |       |      |       |       |       |       |       |
|---------------------------------------------------|-------|------|-------|-------|-------|-------|-------|
| v32 Proportion of people aged 0-15                | 32.74 | 7.21 | 9.44  | 27.46 | 32.64 | 38.28 | 6.77  |
| v33 Proportion of people aged 16 to 30 years old  | 31.35 | 3.12 | 23.23 | 29.43 | 31.16 | 33.26 | 51.47 |
| v34 Proportion of persons aged 31 to 60 years old | 32.76 | 5.08 | 19.22 | 29.36 | 32.72 | 36.37 | 54.44 |
| v35 Proportion of people aged 61 and over         | 5.16  | 2.93 | 0.87  | 3.21  | 4.16  | 6.10  | 47.73 |

217

218 In Table 3, we observed the results from the AIC criterion's application for the selection  
 219 of the most appropriate probability distribution considering the total number of TB cases, by  
 220 which we can identify that the Double Poisson distribution (DPO) presented the best result (the  
 221 highest AIC).

222

223 **Table 3. The main distributions for fitting a GAMLSS model selected in accordance with**  
 224 **the Akaike Information Criterion value, Eastern Amazonia (Brazil).**

225

| Distribution for fitting a GAMLSS model                                   | Akaike information criterion (AIC) |
|---------------------------------------------------------------------------|------------------------------------|
| The Double Poisson distribution (DPO)                                     | 2004.25                            |
| Zero Inflated Negative Binomial Distribution (ZINBI)                      | 2006.04                            |
| Zero adjusted negative binomial distribution (ZANBI)                      | 2006.04                            |
| Zero adjusted (hurdle) of the beta negative binomial distribution (ZABNB) | 2008.02                            |
| Zero-inflated of the beta negative binomial distribution (ZIBNB)          | 2008.02                            |
| The Zipf and zero adjusted Zipf distributions (ZINBF)                     | 2008.04                            |
| The Sichel distribution (ZISICHEL)                                        | 2008.04                            |
| Zero-inflated Poisson inverse Gaussian distribution (ZIPIG)               | 2008.22                            |
| Negative Binomial type II distribution (SNBII)                            | 2010.27                            |
| Negative Binomial type I distribution (SBNBI)                             | 2010.27                            |

226

227 In Fig 4, we have the superposition of the DPO density over the data distribution. The  
 228 application of the Shapiro-Wilk normality test on the model's residuals shows the adequacy of  
 229 the fit ( $W = 0.9967$ ;  $p\text{-value} = 0.5245$ ).

230

231 **Fig 4. Histograms of Tuberculosis cases with fit to the transformed Double Poisson**  
 232 **distribution, Eastern Amazonia (Brazil).**

233

234 In Table 4, we included the statistics obtained from the modeling analysis, where we  
 235 identify the complete model (saturated) selected through GAIC (no outlier) with quadratic

236 terms and no quadratic outlier (v33 and v19). These variables represent factors associated with  
 237 territories specifically deficient or absent of a sewage disposal system and the prevalence of  
 238 younger people (16 to 30 years old) or older (higher than 61 years old). After the application  
 239 of LR, the model with the quadratic terms was more fit when compared to the linear model. In

| $\mu$                                                                                                                                             | Estimate | Std. Error | t value | Pr(> t ) |
|---------------------------------------------------------------------------------------------------------------------------------------------------|----------|------------|---------|----------|
| (Intercept)                                                                                                                                       | 0.4331   | 0.2063     | 2.0995  | 0.0364** |
| v19^1 Permanent private households with a bathroom for exclusive use by the residents or a toilet and sewage via river, lake, or sea              | -6.9247  | 1.9192     | -3.6081 | 0.0003** |
| v19^2 Permanent private households with a bathroom for exclusive use by the residents or a toilet and sewage via river, lake, or sea              | -3.4713  | 1.1011     | -3.1526 | 0.0017** |
| **v33^1 Proportion of people aged 16 to 30 years old                                                                                              | 2.6266   | 0.9350     | 2.8091  | 0.0052** |
| v33^2 Proportion of people aged 16 to 30 years old                                                                                                | -2.4703  | 1.0115     | -2.4423 | 0.0150** |
| v17 Permanent private households with a bathroom for exclusive use by the residents or a toilet and sanitary sewage via a septic tank             | 0.0044   | 0.0023     | 1.9035  | 0.0577   |
| v35 Proportion of people aged 61 and over                                                                                                         | 0.0731   | 0.0163     | 4.4791  | 0.0000** |
| v18 Permanent private households with a bathroom for exclusive use by the residents or a toilet and sanitary sewage via a rudimentary septic tank | 0.0042   | 0.0021     | 2.0369  | 0.0423** |
| $\Sigma$                                                                                                                                          | Estimate | Std. Error | t value | Pr(> t ) |
| (Intercept)                                                                                                                                       | 0,7195   | 0,0761     | 9,4514  | 0,0000** |

240 the table, v19^1 is the linear term of v19 and v19^2 is the quadratic term of v19. The same  
 241 explanation should be considered in v33.

242

243 **Table 4. Model of the structural and intermediary social determinants associated with**  
 244 **community TB infection in Eastern Amazonia (Brazil).**

245

246 \*Shapiro-Wilk normality test; data: residuals (ajuste\_o2c)  
 247 W = 0.99681, p-value = 0.5654; Likelihood Ratio Test for nested GAMLSS models;  
 248 (No check whether the models are nested is performed). Null model: deviance= 1884.811 with  
 249 7 deg. of freedom  
 250 Alternative model: deviance= 1866.812 with 9 deg. of freedom; LRT = 17.99909 with 2 deg.  
 251 of freedom and p-value= 0.0001234661  
 252 \*\*p<0.05  
 253

254 Fig 5 presents the graph of predicted values containing the values of the variables with  
255 quadratic terms v19 and v33. Considering that variables v17, v18 and v35 are equal in terms  
256 of their respective medians, in other words, v17 = 18.74%, v18 = 49.35% and v35 = 5.17%).  
257 In this case, if we consider that v19=10%, v33=20%, the expected average number of TB cases  
258 is 0.7367; When we consider v19 = 20% and v33 = 30%, the expected average number of cases  
259 is 3.7824; and if we consider v19 = 30% and v33 = 40%, the average expected number of cases  
260 is 2.86. Fig 6 has been added as supplementary material for predicting the number of cases in  
261 accordance with the ranged value of v19 and v33.

262

263 **Fig 5. Graph with predicted values obtained from the modeling with quadratic terms,**  
264 **Eastern Amazonia (Brazil).**

265

266 **Fig 6. Predicting the number of cases according to the range value of v19 and v33.**

267

## 268 **DISCUSSION**

269 We found evidence that GAMLSS is superior when compared to the other techniques  
270 applied for studying the social determinants[12]. The first potentiality is because the GAMLSS  
271 estimates the complete conditional distribution, which means that the response variable can be  
272 better estimated by a probability distribution such as the gamma or lognormal distribution[24].  
273 Another potentiality or advantage is that all resources are available through R packages, where  
274 it is allowed to adjust more than 50 different kinds of distributions.

275 Through our findings, we identified the structural determinants (represented by age)  
276 and intermediary (expressed by sanitary conditions of the environment such as treated sewage).  
277 The literature has evidenced that people of economically active age who are males were more  
278 commonly affected by TB, which might be related to our findings[25].



279           According to the national data, nearly 8.5% of TB cases that were diagnosed in 2017  
280 were in people 19 or younger[25]. In Brazil, TB in adolescents has long remained a hidden  
281 pandemic and still continues to be neglected. TB in adolescents needs to be considered a  
282 sentinel event since it is related to a recent infection through contact with a bacilliferous  
283 adult[25].

284           Another issue that may be associated with our findings is a situation revealed by a recent  
285 IBGE survey, which concluded that the country has 14.8 million unemployed people, which  
286 represents 14.7% of the economically active population. However, this rate is even higher  
287 among young people; in the 14 to 17 age group, 46% are looking for work; and from 18 to 24  
288 years old, unemployment affects 31% of people, which takes these people into an extreme  
289 social vulnerability zone. The study also evidenced that long-term unemployment is  
290 characterized by the predominance of people between the ages of 17 and 29. This data is from  
291 Brazil, but when it is considered data from Eastern Amazonia, this situation can become even  
292 more serious[26].

293           We also found the association with territories with a predominance of elderly people  
294 (age older than 61 years old), and the literature has shown that the elderly are more vulnerable  
295 to falling into poverty when compared to the other groups[27]. This is because the elderly have  
296 a lesser chance of recovering from a negative income shock, and they have difficulties  
297 (re)entering the labor market because productivity and employability decline with age from  
298 around the age of 60. As a result of the difficulty of recovering from negative income shocks  
299 among the elderly, poverty tends to be a more permanent feature than with other groups in the  
300 society[27], which makes them vulnerable to poverty as well as to the TB determinants[28].

301           A study from Eastern Amazonia has shown a growth of TB among the elderly, which  
302 is related to the deterioration of social conditions because of austerity politics adopted in Brazil,

303 mainly related to the weakness in social security in ensuring social protection to the elderlies,  
304 and their difficulty in getting good food, quality of life and improved house conditions[29].

305 We also observed that the context favorable for sickness due to TB is associated with  
306 access to basic sanitation. This is another serious situation observed in developing countries;  
307 according to literature, more than 2 billion people worldwide do not have access to basic  
308 sanitation, which represents more than 25% of the world's population[30]. According to a  
309 study that assessed the access to basic sanitation in Brazil, almost 90% of the residents of  
310 Macapá do not have access to the sewage network, and as in the whole country, Macapá invests  
311 less than 30% of their financial resources picked up with taxes[31].

312 Investments in terms of better housing conditions and basic sanity is a condition  
313 essential for the quality of life of people as well as for avoiding neglected diseases such as TB.  
314 The Sustainable Development Goals, also known as the Global Goals, seek to reconcile  
315 economic growth, environmental balance, and social progress, ensuring that all people have  
316 the same opportunities and can lead a better life without compromising the planet[32]. It is  
317 among its goals by 2030 to achieve universal and equitable access to basic sanitation and clean  
318 water; however, achieving these goals is a challenge in Brazil, mainly in Eastern Amazonia.

319 Eastern Amazonia has the largest percentage of its territory set aside for integral natural  
320 protection through the so-called Legally Allocated Areas, and contradictorily, has almost half  
321 of its population living below the poverty line, with 45.9% of people having one full meal every  
322 three days. A large part living in subhuman conditions in hangover areas, worsening the  
323 pictures of violence, suicide, and public health, while leaving 20.2% of its entire labor force  
324 unemployed. Therefore, all these aspects contributed a lot to the sickness of the community  
325 due to TB. It is important to find strategies not only for prevention, diagnosis, treatment, and  
326 recovery / rehabilitation, but to fundamentally find solutions sustainable and balanced with the  
327 environment in Amazonia.

328           Therefore, politics addressed to ensure sustainability is quite important for bringing  
329 better conditions of life to the people who live in the region. Historically, the poverty in the  
330 region became evident from the decolonization process with the formation of a dependent labor  
331 market in extremely precarious conditions. New strategies are important and effective public  
332 policies aimed at social justice to the specificities of the Amazon region and not just an attempt  
333 to solve social inequalities with compensatory policies such as the *Bolsa Familia*[33].

334           The study advances knowledge by evidencing the structural and intermediary social  
335 determinants of TB in Eastern Amazonia. However, the model only included cases of TB. It  
336 would be interesting to advance with other aspects of the disease through mathematical models  
337 such as infection and confirm if they are the same as the disease[4]. We used the GAMLSS  
338 that evidenced important aspects for understanding the context of TB and how the structural  
339 and intermediary determinants impacted on communities burdened by TB, where it was  
340 possible to estimate the number of cases for each territory or UCT under study.

341           We used a more usual approach, which did not assume the existence of the constraint,  
342 which may be a potential limitation of the study. This is the first study applied in Eastern  
343 Amazonia that confirms its novelty and originality. Unfortunately, Brazil has not carried out  
344 its Demographic Census yet, mainly because of the budget shortfall. Therefore, the social  
345 situation identified may have worsened, mainly due to the COVID-19 pandemic, which means  
346 that the goal End TB by 2050 seems more distant than we think.

347

#### 348 **Competing interests**

349 The authors declare that they have no competing interests.

350

#### 351 **Acknowledgements**

352 The authors greatly appreciate the outstanding and committed study assistance of Health  
353 Bureau of Mapacá – AP Brazil. We thank Jason Farley and Nancy Reynolds for critically  
354 reading the manuscript. Moreover, we thank CAPES and CNPq for contributing to the study.

355

356 **Author Contributions**

357 **Conceptualization:** Clóvis Luciano Giacomet, Antônio Carlos Vieira Ramos, Heriederson  
358 Sávio Dias Moura, Thaís Zamboni Berra, Ricardo Alexandre Arcêncio.

359 **Data curation:** Clóvis Luciano Giacomet, Antônio Carlos Vieira Ramos, Thaís Zamboni  
360 Berra, Jonas Bodini Alonso.

361 **Formal analysis:** Clóvis Luciano Giacomet, Antônio Carlos Vieira Ramos, Thaís Zamboni  
362 Berra, Jonas Bodini Alonso.

363 **Funding acquisition:** Clóvis Luciano Giacomet, Heriederson Sávio Dias Moura, Ricardo  
364 Alexandre Arcêncio.

365 **Methodology:** Clóvis Luciano Giacomet, Antônio Carlos Vieira Ramos, Thaís Zamboni  
366 Berra, Felipe Mendes Delpino, Jonas Bodini Alonso, Ricardo Alexandre Arcêncio.

367 **Software:** Jonas Bodini Alonso, Ricardo Alexandre Arcêncio.

368 **Supervision:** Clóvis Luciano Giacomet, Ricardo Alexandre Arcêncio.

369 **Validation:** Clóvis Luciano Giacomet, Antônio Carlos Vieira Ramos, Thaís Zamboni Berra,  
370 Jason E. Farley, Nancy R. Reynolds, Jonas Bodini Alonso, Ricardo Alexandre Arcêncio.

371 **Writing – original draft:** Clóvis Luciano Giacomet, Antônio Carlos Vieira Ramos,  
372 Heriederson Sávio Dias Moura, Thaís Zamboni Berra, Yan Mathias Alves, Felipe Mendes  
373 Delpino, Jonas Bodini Alonso, Ricardo Alexandre Arcêncio

374 **Writing – review & editing:** Clóvis Luciano Giacomet, Antônio Carlos Vieira Ramos,  
375 Heriederson Sávio Dias Moura, Thaís Zamboni Berra, Yan Mathias Alves, Felipe Mendes  
376 Delpino, Jason E. Farley, Nancy R. Reynolds, Jonas Bodini Alonso, Titilade Kehinde  
377 Ayandeyi Teibo, Ricardo Alexandre Arcêncio.

378

379 **Funding**

380 CAPES (code 001) and CNPq (scholarship Research productivity fellowship at the 1C level –  
381 process 304483/2018-4).

382

383 **REFERENCES**

384 1. World Health Organization. Global tuberculosis report 2021, 2021. Accessed: Dec 10,  
385 2021. Available from: <https://apps.who.int/iris/handle/10665/346387>.

386 2. United Nations. World Social Report 2020: Inequality in a Rapidly Changing World,

- 387 2020. Accessed Dec 10, 2021. Available from: [https://www.un-ilibrary.org/economic-](https://www.un-ilibrary.org/economic-and-social-development/world-social-report-2020_7f5d0efc-en)  
388 [and-social-development/world-social-report-2020\\_7f5d0efc-en](https://www.un-ilibrary.org/economic-and-social-development/world-social-report-2020_7f5d0efc-en).
- 389 3. Silva S, Arinaminpathy N, Atun R, Goosby E, Reid M. Economic impact of  
390 tuberculosis mortality in 120 countries and the cost of not achieving the Sustainable  
391 Development Goals tuberculosis targets: a full-income analysis. *Lancet Glob Health*.  
392 2021;9(10): e1372–9. doi: 10.1016/S2214-109X(21)00299-0.
- 393 4. Pedrazzoli D, Boccia D, Dodd PJ, Lönnroth K, Dowdy DW, Siroka A, et al.  
394 Modelling the social and structural determinants of tuberculosis: opportunities and  
395 challenges. *Int J Tuberc Lung Dis Off J Int Union Tuberc Lung Dis*. 2017;21(9): 957–  
396 64. doi: 10.5588/ijtld.16.0906.
- 397 5. Moreira ASR, Kritski AL, Carvalho ACC. Social determinants of health and  
398 catastrophic costs associated with the diagnosis and treatment of tuberculosis. *J Bras*  
399 *Pneumol*. 2020;46(05): e20200015. doi: 10.36416/1806-3756/e20200015.
- 400 6. Duarte R, Lönnroth K, Carvalho C, Lima F, Carvalho ACC, Muñoz-Torrico M, et al.  
401 Tuberculosis, social determinants and co-morbidities (including HIV). *Pulmonology*  
402 2018;24(2): 115-119. doi: 10.1016/j.rppnen.2017.11.003.
- 403 7. Zille AI, Werneck GL, Luiz RR, Conde MB. Social determinants of pulmonary  
404 tuberculosis in Brazil: an ecological study. *BMC Pulm Med*. 19(1): 87. doi:  
405 10.1186/s12890-019-0855-1.
- 406 8. Kilabuk E, Momoli F, Mallick R, Van Dyk D, Pease C, Zwerling A, et al. Social  
407 determinants of health among residential areas with a high tuberculosis incidence in a  
408 remote Inuit community. *J Epidemiol Community Health*. 73(5): 401-406. doi:  
409 10.1136/jech-2018-211261.
- 410 9. Wingfield T, Tovar MA, Datta S, Saunders MJ, Evans CA. Addressing social  
411 determinants to end tuberculosis. *Lancet*. 391(10126): 1129-1132. doi:

- 412 10.1016/S0140-6736(18)30484-7.
- 413 10. Rigby RA, Stasinopoulos DM. Generalized additive models for location, scale and  
414 shape. *J R Stat Soc Ser C Appl Stat.* 2005;54(3): 507–54. doi: 10.1111/j.1467-  
415 9876.2005.00510.x.
- 416 11. De Bastiani F, Rigby RA, Stasinopoulos DM, Cysneiros AHMA, Uribe-Opazo MA.  
417 Gaussian Markov random field spatial models in GAMLSS. *J Appl Stat.* 45(2018):  
418 168–86. doi: 10.1080/02664763.2016.1269728.
- 419 12. Giacomet CL, Santos MS, Berra TZ, Alves YM, Alves LS, Costa FBP, et al.  
420 Temporal trend of tuberculosis incidence and its spatial distribution in Macapá –  
421 Amapá. *Rev Saude Publica.* 55: 96. doi: 10.11606/s1518-8787.2021055003431.
- 422 13. Santana JLA, Magrini AT, Ribeiro LA, Rigelli RH, Araujo MHM. Adesão ao  
423 tratamento da tuberculose no Amapá: Um quinquênio de análise epidemiológica. *Rev*  
424 *Científica Multidiscip Núcleo Conhecimento.* 10: 69–87.  
425 doi: 10.32749/nucleodoconhecimento.com.br/saude/tratamento-da-tuberculose.
- 426 14. World Health Organization. Meeting report of the WHO expert consultation on drug-  
427 resistant tuberculosis treatment outcome definitions, 17-19 November 2020.  
428 Accessed: Dec 13, 2021. Available from:  
429 <https://apps.who.int/iris/handle/10665/340284>.
- 430 15. Brasil. Ministério da Saúde. Secretaria de Vigilância em Saúde. Departamento de  
431 Vigilância das Doenças Transmissíveis. Manual de Recomendações para o Controle  
432 da Tuberculose no Brasil, 2019; 2a ed. atualizada, 364. Accessed: Dec 13, 2021.  
433 Available from:  
434 [https://bvsms.saude.gov.br/bvs/publicacoes/manual\\_recomendacoes\\_controle\\_tubercu](https://bvsms.saude.gov.br/bvs/publicacoes/manual_recomendacoes_controle_tubercu)  
435 [lose\\_brasil\\_2\\_ed.pdf](https://bvsms.saude.gov.br/bvs/publicacoes/manual_recomendacoes_controle_tubercu).
- 436 16. Boing AF, Boing AC, Subramanian SV. Inequalities in the access to healthy urban

- 437 structure and housing: an analysis of the Brazilian census data. *Cad Saúde Pública*.  
438 37(6): e00233119. doi: 10.1590/0102-311X00233119.
- 439 17. Solar O, Irwin A. A conceptual framework for action on the social determinants of  
440 health, *Social Determinants of Health Discussion Paper 2 (Policy and Practice)*.  
441 Geneva, Switzerland: World Health Organization. 2010. Accessed: Dec 10, 2021.  
442 Available from: <https://apps.who.int/iris/handle/10665/44489>.
- 443 18. Florencio LA. Engenharia de avaliações com base nos modelos GAMLSS. Master's  
444 Thesis, Federal University of Pernambuco, 2010. Available from:  
445 <https://repositorio.ufpe.br/handle/123456789/6227>.
- 446 19. Akaike H. A new look at the statistical model identification. *IEEE Trans Autom*  
447 *Control*. 19(6): 716–23. doi: 10.1109/TAC.1974.1100705.
- 448 20. Stasinopoulos M, Rigby B, Akantziliotou C. Instructions on how to use the *gamlss*  
449 package in R, 2008. Accessed: Dec 14, 2021. Available from:  
450 <http://www.gamlss.com/wp-content/uploads/2013/01/gamlss-manual.pdf>.
- 451 21. Myers RH, Montgomery DC, Anderson-Cook CM. *Response surface methodology:*  
452 *process and product optimization using designed experiments*. Vanderbilt University,  
453 Hoboken, New Jersey: Wiley, 2016. Accessed: Dec 21, 2021. Available from:  
454 <https://catalog.library.vanderbilt.edu/discovery/fulldisplay/alma991043342547203276>  
455 [/01VAN\\_INST:vanui](#).
- 456 22. Stasinopoulos DM, Rigby RA. Generalized Additive Models for Location Scale and  
457 Shape (GAMLSS) in R. *Journal of Statistical Software*. 23(7): 1–46.  
458 <https://doi.org/10.18637/jss.v023.i07>.
- 459 23. Jesus FB, Lima FCA, Martins CBG, Matos KF, Souza SPS. Vulnerabilidade na  
460 adolescência: a experiência e expressão do adolescente. *Rev Gaúcha Enferm*. 32(2):  
461 359-67. doi: 10.1590/S1983-14472011000200021.

- 462 24. Shelby T, Meyer AJ, Ochom E, Turimumahoro P, Babirye D, Katamba A, et al.  
463 Social determinants of tuberculosis evaluation among household contacts: a  
464 secondary analysis. *Public Health Action*. 8(3): 118-123. doi: 10.5588/fa.18.0025.
- 465 25. Santos BA, Cruz RPS, Lima SVMA, Santos AD, Duque M, Araújo KCGM, et al.  
466 Tuberculose em crianças e adolescentes: uma análise epidemiológica e espacial no  
467 estado de Sergipe, Brasil, 2001-2017. *Ciênc Saúde Coletiva*. 25(8): 2939–48. doi:  
468 10.1590/1413-81232020258.25692018.
- 469 26. Brasil. Instituto Brasileiro de Geografia e Estatísticas. Pesquisa aponta que os jovens  
470 são os mais afetados pelo desemprego, 2021. Accessed: Jan 21, 2021. Available from:  
471 [https://agenciabrasil.ebc.com.br/radioagencia-nacional/economia/audio/2021-](https://agenciabrasil.ebc.com.br/radioagencia-nacional/economia/audio/2021-08/pesquisa-aponta-que-os-jovens-sao-os-mais-afetados-pelo-desempregohtml)  
472 [08/pesquisa-aponta-que-os-jovens-sao-os-mais-afetados-pelo-desempregohtml](https://agenciabrasil.ebc.com.br/radioagencia-nacional/economia/audio/2021-08/pesquisa-aponta-que-os-jovens-sao-os-mais-afetados-pelo-desempregohtml).
- 473 27. Travassos GF, Coelho AB, Arends-Kuenning MP. The elderly in Brazil: demographic  
474 transition, profile, and socioeconomic condition. *Rev Bras Estud Popul*. 37: 1–27. doi:  
475 10.20947/S0102-3098a0129.
- 476 28. Negin J, Abimbola S, Marais BJ. Tuberculosis among older adults – time to take  
477 notice. *Int J Infect Dis*. 32: 135–7. doi: 10.1016/j.ijid.2014.11.018.
- 478 29. Mesquita CR, Lima KVB, Souza e Guimarães RJP, Santos BO, Rodrigues LHA,  
479 Costa RJF, et al. Análise retrospectiva de casos de tuberculose em idosos. *Rev Bras*  
480 *Em Promoção Saúde* 2021;34: 1117. doi: 10.5020/18061230.2021.11117.
- 481 30. Swe KT, Rahman MM, Rahman MS, Teng Y, Abe SK, Hashizume M, et al. Impact of  
482 poverty reduction on access to water and sanitation in low- and lower-middle-income  
483 countries: country-specific Bayesian projections to 2030. *Trop Med Int Health*. 26(7):  
484 760-774. doi: 10.1111/tmi.13580.
- 485 31. Instituto Trata Brasil. Ranking do Saneamento 2021, 2021. Accessed: Jan 19, 2022.  
486 Available from:



487 [https://tratabrasil.org.br/images/estudos/Ranking\\_saneamento\\_2021/Ranking\\_do\\_San](https://tratabrasil.org.br/images/estudos/Ranking_saneamento_2021/Ranking_do_San)  
488 [eamento\\_2021\\_-\\_tabela\\_das\\_100\\_maiores\\_cidades\\_do\\_Brasil\\_.pdf](https://tratabrasil.org.br/images/estudos/Ranking_saneamento_2021/Ranking_do_Saneamento_2021_-_tabela_das_100_maiores_cidades_do_Brasil_.pdf).

489 32. Duran DC, Artene A, Gogan LM, Duran V. The Objectives of Sustainable  
490 Development - Ways to Achieve Welfare. *Procedia Econ Finance*. 26(2015): 812–7.  
491 doi: 10.1016/S2212-5671(15)00852-7.

492 33. Rolim DC. A pobreza e a riqueza na região amazônica e a contribuição da política de  
493 assistência social: o Estado do Amazonas em foco. VII Jornada Internacional Políticas  
494 Públicas. Universidade Federal do Maranhão. Centro de Ciências Sociais. Programa  
495 de Pós-Graduação em Políticas Públicas 2015:13. Accessed: Jan 19, 2022. Available  
496 from: [http://www.joinpp.ufma.br/jornadas/joinpp2015/pdfs/eixo4/a-pobreza-e-a-](http://www.joinpp.ufma.br/jornadas/joinpp2015/pdfs/eixo4/a-pobreza-e-a-riqueza-na-regiao-amazonica-e-a-contribuicao-da-politica-de-assistencia-social-o-estado-do-amazonas-em-foco.pdf)  
497 [riqueza-na-regiao-amazonica-e-a-contribuicao-da-politica-de-assistencia-social-o-](http://www.joinpp.ufma.br/jornadas/joinpp2015/pdfs/eixo4/a-pobreza-e-a-riqueza-na-regiao-amazonica-e-a-contribuicao-da-politica-de-assistencia-social-o-estado-do-amazonas-em-foco.pdf)  
498 [estado-do-amazonas-em-foco.pdf](http://www.joinpp.ufma.br/jornadas/joinpp2015/pdfs/eixo4/a-pobreza-e-a-riqueza-na-regiao-amazonica-e-a-contribuicao-da-politica-de-assistencia-social-o-estado-do-amazonas-em-foco.pdf).

499

## 500 **Supporting information**

501 S1 – Dataset

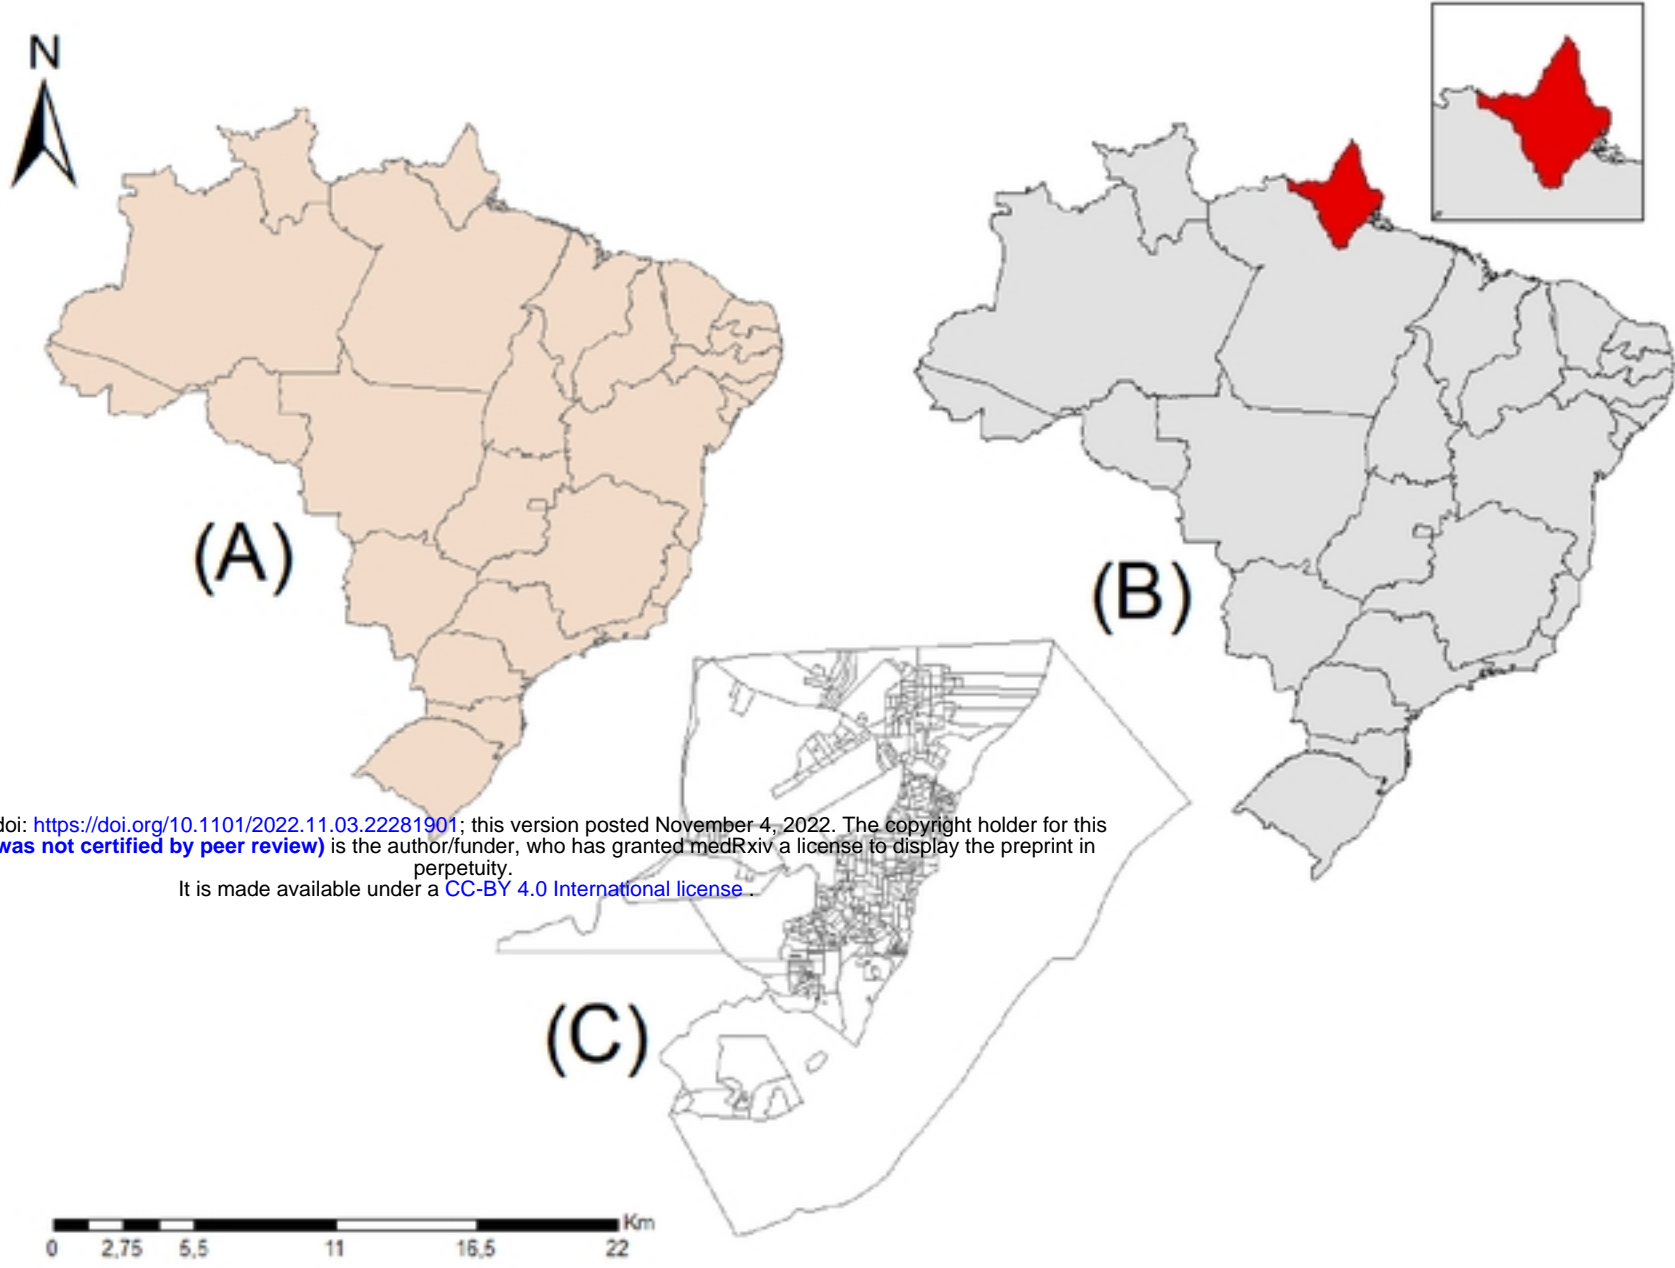

medRxiv preprint doi: <https://doi.org/10.1101/2022.11.03.22281901>; this version posted November 4, 2022. The copyright holder for this preprint (which was not certified by peer review) is the author/funder, who has granted medRxiv a license to display the preprint in perpetuity. It is made available under a [CC-BY 4.0 International license](#).

medRxiv preprint doi: <https://doi.org/10.1101/2022.11.03.22281901>; this version posted November 1, 2022. The copyright holder for this preprint (which was not certified by peer review) is the author/funder, who has granted medRxiv a license to display the preprint in perpetuity. It is made available under a [CC-BY 4.0 International license](https://creativecommons.org/licenses/by/4.0/).

| Social Determinants | Definition                                                                                                                                                                                                                                                                                                                            | proxy indicators                                                                                       | Variables                                                                                                                                                                                                            | Code                     |
|---------------------|---------------------------------------------------------------------------------------------------------------------------------------------------------------------------------------------------------------------------------------------------------------------------------------------------------------------------------------|--------------------------------------------------------------------------------------------------------|----------------------------------------------------------------------------------------------------------------------------------------------------------------------------------------------------------------------|--------------------------|
| Structural          | The structural determinant are those that interplay between context and socioeconomic position, generating and reinforcing class divisions, define the socio-economical position within hierarchies of power, prestige, and access to resources[18].                                                                                  | Income                                                                                                 | - Proportion of households with no nominal monthly income per capita                                                                                                                                                 | v20                      |
|                     |                                                                                                                                                                                                                                                                                                                                       |                                                                                                        | - Proportion of households with per capita nominal monthly income of up to 1/8 to 1 minimum wage                                                                                                                     | v21                      |
|                     |                                                                                                                                                                                                                                                                                                                                       |                                                                                                        | - Proportion of households with a nominal monthly per capita income of more than 1 to 2 minimum wages                                                                                                                | v22                      |
|                     |                                                                                                                                                                                                                                                                                                                                       |                                                                                                        | - Proportion of domiciles with nominal monthly income per capita of more than 2 to 3 minimum wages                                                                                                                   | v23                      |
|                     |                                                                                                                                                                                                                                                                                                                                       |                                                                                                        | - Proportion of households with a nominal monthly income per capita of more than 3 to 5 minimum wages                                                                                                                | v24                      |
|                     |                                                                                                                                                                                                                                                                                                                                       | - Proportion of households with a nominal monthly income per capita of more than 5 to 10 minimum wages | v25                                                                                                                                                                                                                  |                          |
|                     |                                                                                                                                                                                                                                                                                                                                       | Education and gender                                                                                   | - Proportion of males without schooling<br>- Proportion of females without schooling                                                                                                                                 | v05<br>v06               |
|                     |                                                                                                                                                                                                                                                                                                                                       | Race/ ethnicity                                                                                        | - Proportion of resident people of white race or ethnicity                                                                                                                                                           | v26                      |
|                     |                                                                                                                                                                                                                                                                                                                                       |                                                                                                        | - Proportion of black residents                                                                                                                                                                                      | v27                      |
|                     |                                                                                                                                                                                                                                                                                                                                       |                                                                                                        | - Proportion of resident people of yellow race or ethnicity                                                                                                                                                          | v28                      |
|                     |                                                                                                                                                                                                                                                                                                                                       |                                                                                                        | - Proportion of resident people of mixed race or ethnicity                                                                                                                                                           | v29                      |
|                     |                                                                                                                                                                                                                                                                                                                                       |                                                                                                        | - Proportion of resident people of indigenous race or ethnicity                                                                                                                                                      | v30                      |
| Intermediary        | Structural determinants operate through a series of factors that will influence the health condition of a person, which WHO[18] named as the intermediary social factors. These factors are accumulative in a person's life course and flow from the social stratification, determining differences in exposure and vulnerability and | Agglomeration (quantitative of people who live in the domiciles)                                       | - Proportion of households with 1 to 3 people<br>- The proportion of households with 4 to 6 people<br>- The proportion of households with 7 to 9 people<br>- The proportion of households with higher than 10 people | v01<br>v02<br>v03<br>v04 |
|                     |                                                                                                                                                                                                                                                                                                                                       | Age                                                                                                    | - Proportion of people aged 0-15<br>- Proportion of people aged 16 to 30 years old<br>- Proportion of persons aged 31 to 60 years old<br>- Proportion of people aged 61 and over                                     | v31<br>v32<br>v33<br>v34 |
|                     |                                                                                                                                                                                                                                                                                                                                       | Conditions of domiciles' property                                                                      | - Proportion of own and paid-up domiciles<br>- Proportion of rented dwellings<br>- Proportion of domiciles in another property condition (not owned, rented, and not granted)                                        | v07<br>v08<br>v09        |
|                     |                                                                                                                                                                                                                                                                                                                                       | Sanitation conditions                                                                                  | - Proportion of households with a bathroom for exclusive use by residents or a toilet and drainage in a general sewage or rainwater network                                                                          | v10                      |
|                     |                                                                                                                                                                                                                                                                                                                                       |                                                                                                        | - Proportion of houses without a bathroom for the exclusive use of residents or toilet                                                                                                                               | v11                      |
|                     |                                                                                                                                                                                                                                                                                                                                       |                                                                                                        | - Permanent particular residences with water supply from the general network                                                                                                                                         | v12                      |

|  |                                                                                                                                                                                         |  |                                                                                                                                                                                                                                                                                                                                                                                                                                                                                                                                                                                                                                                                                                                                                                                                                                                      |                                                                              |
|--|-----------------------------------------------------------------------------------------------------------------------------------------------------------------------------------------|--|------------------------------------------------------------------------------------------------------------------------------------------------------------------------------------------------------------------------------------------------------------------------------------------------------------------------------------------------------------------------------------------------------------------------------------------------------------------------------------------------------------------------------------------------------------------------------------------------------------------------------------------------------------------------------------------------------------------------------------------------------------------------------------------------------------------------------------------------------|------------------------------------------------------------------------------|
|  | <p>are therefore, health-compromising conditions. These factors are material circumstances; psychosocial circumstances; behavioral and/or biological factors, and the health system</p> |  | <ul style="list-style-type: none"> <li>- Permanent particular residences with water supply from wells or springs on the property</li> <li>- Permanent Particular Domiciles with Another Form of Water Supply</li> <li>- Permanent private households with a bathroom exclusively for residents or a toilet and sanitary sewage via the general sewage system or rainwater drainage system</li> <li>- Permanent private households with a bathroom for exclusive use by the residents or a toilet and sanitary sewage via a septic tank</li> <li>- Permanent private households with a bathroom for exclusive use by the residents or a toilet and sanitary sewage via a rudimentary septic tank</li> <li>- Permanent private households with a bathroom for exclusive use by the residents or a toilet and sewage via river, lake, or sea</li> </ul> | <p>v13</p> <p>v14</p> <p>v15</p> <p>v16</p> <p>v17</p> <p>v18</p> <p>v19</p> |
|--|-----------------------------------------------------------------------------------------------------------------------------------------------------------------------------------------|--|------------------------------------------------------------------------------------------------------------------------------------------------------------------------------------------------------------------------------------------------------------------------------------------------------------------------------------------------------------------------------------------------------------------------------------------------------------------------------------------------------------------------------------------------------------------------------------------------------------------------------------------------------------------------------------------------------------------------------------------------------------------------------------------------------------------------------------------------------|------------------------------------------------------------------------------|

medRxiv preprint doi: <https://doi.org/10.1101/2022.11.03.22281901>; this version posted November 4, 2022. The copyright holder for this preprint (which was not certified by peer review) is the author/funder, who has granted medRxiv a license to display the preprint in perpetuity. It is made available under a [CC-BY 4.0 International license](https://creativecommons.org/licenses/by/4.0/).

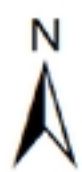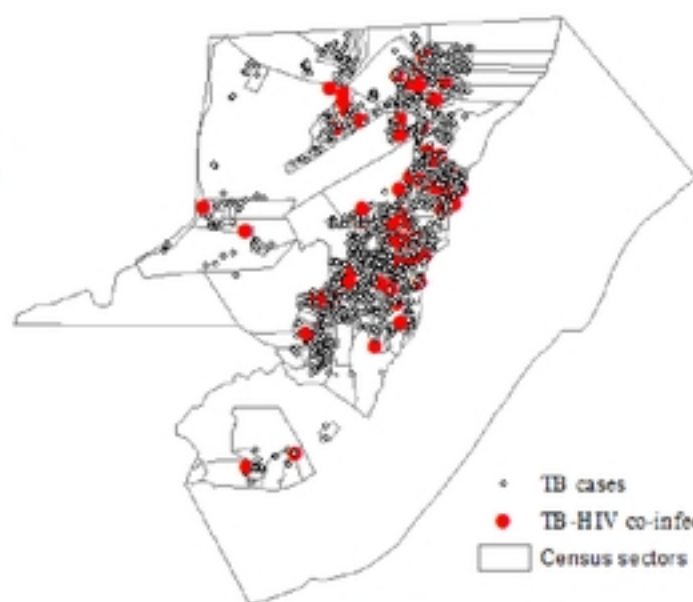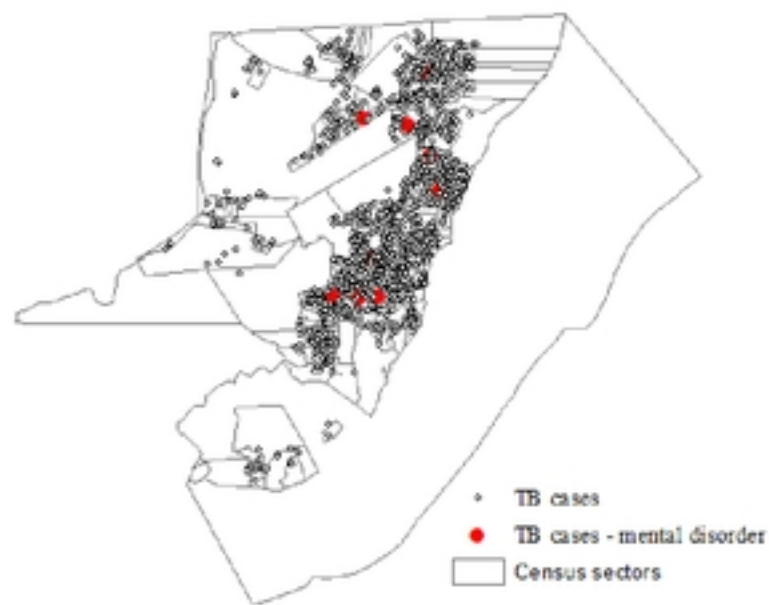

medRxiv preprint doi: <https://doi.org/10.1101/2022.11.03.22281901>; this version posted November 4, 2022. The copyright holder for this preprint (which was not certified by peer review) is the author/funder, who has granted medRxiv a license to display the preprint in perpetuity. It is made available under a [CC BY 4.0 International license](https://creativecommons.org/licenses/by/4.0/).

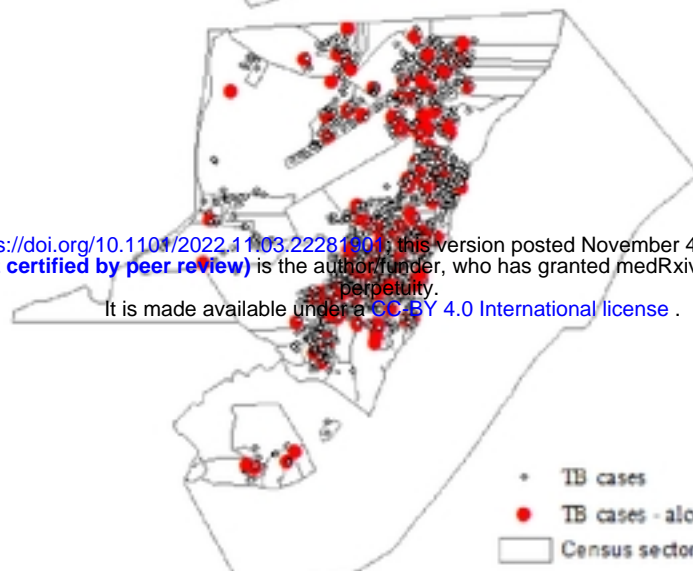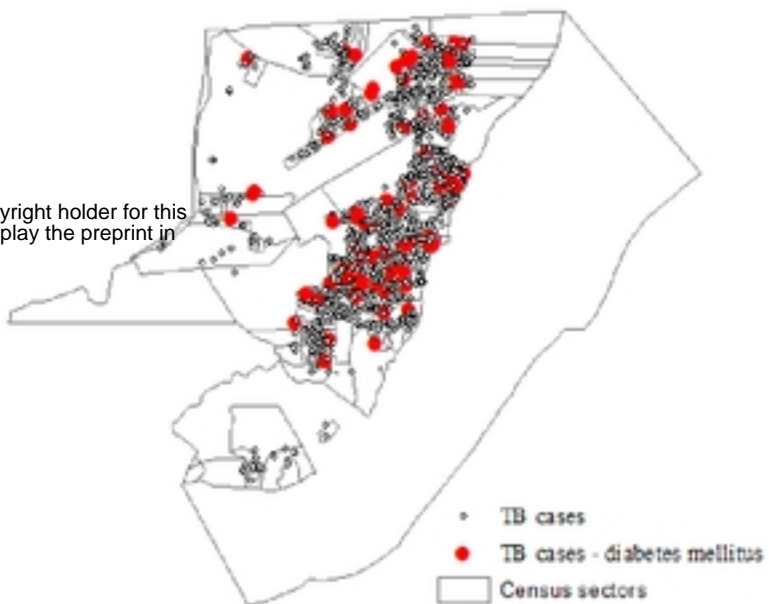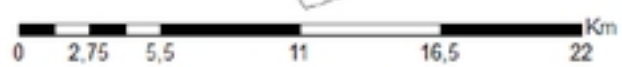

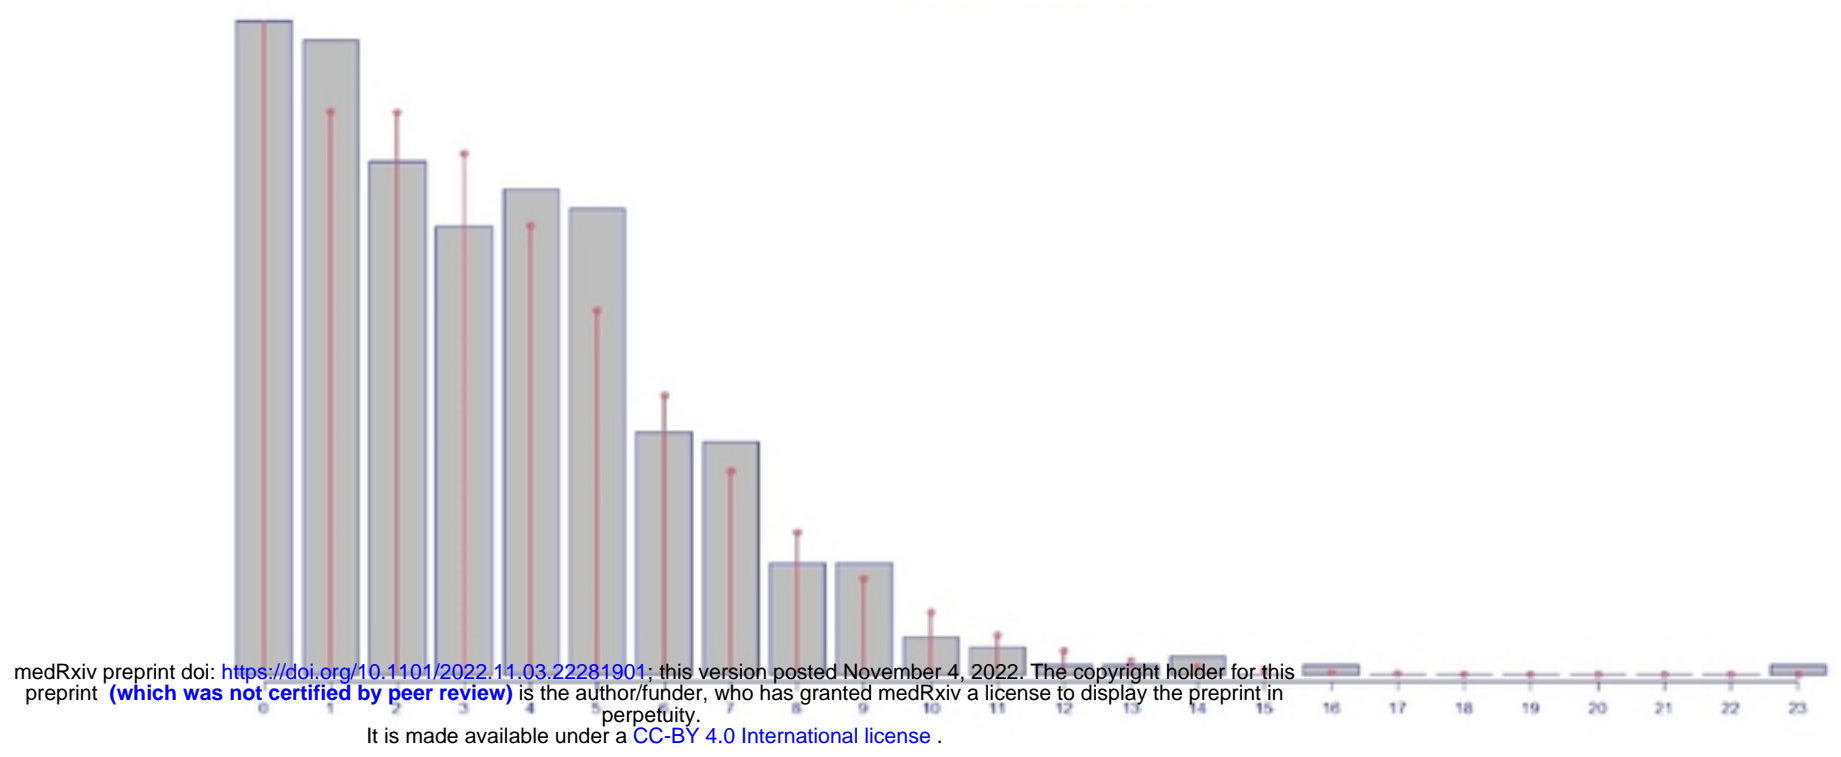

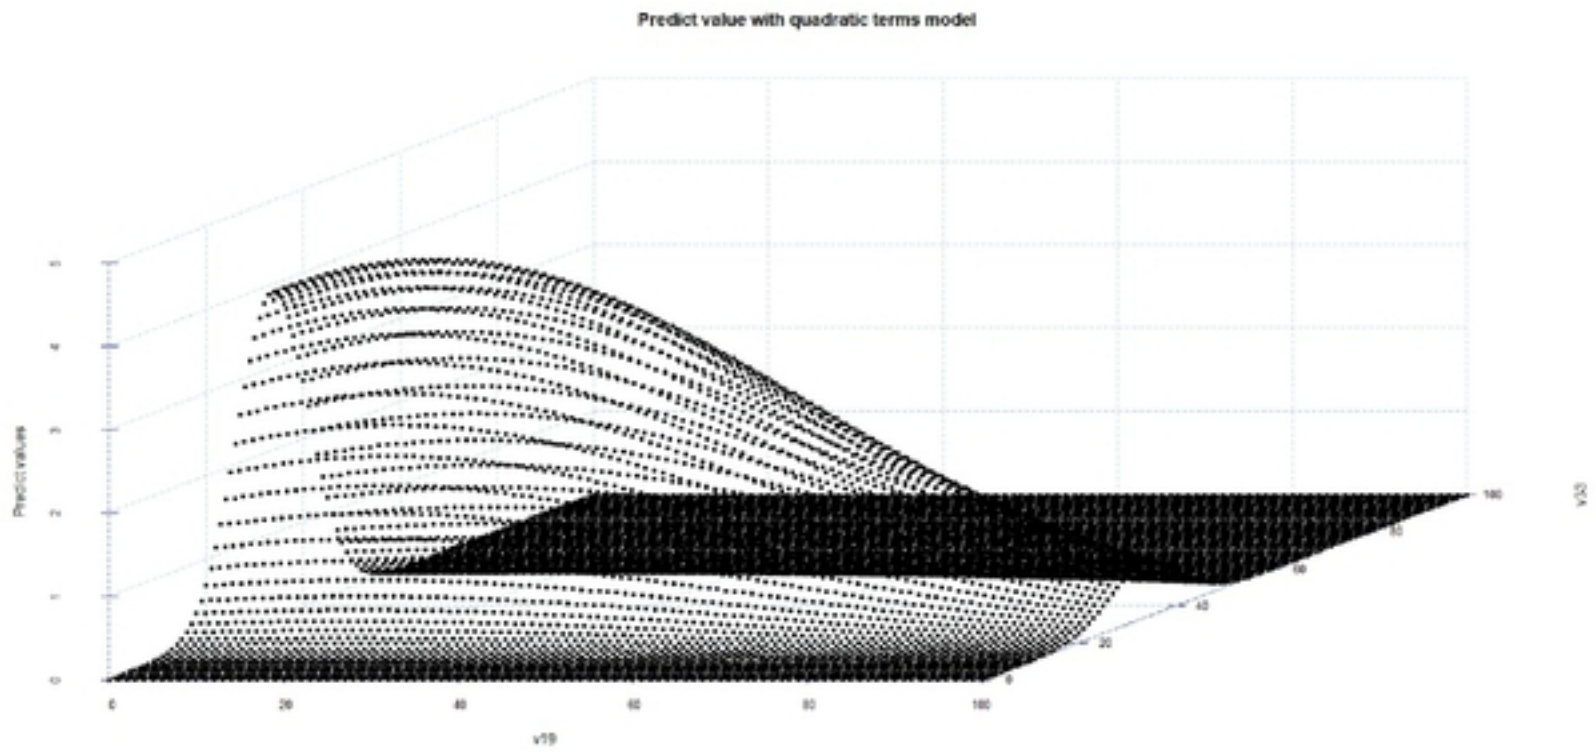

medRxiv preprint doi: <https://doi.org/10.1101/2022.11.03.22281901>; this version posted November 4, 2022. The copyright holder for this preprint (which was not certified by peer review) is the author/funder, who has granted medRxiv a license to display the preprint in perpetuity. It is made available under a [CC-BY 4.0 International license](https://creativecommons.org/licenses/by/4.0/) .

| <b>v19</b> | <b>v33</b> | <b>v17</b> | <b>v18</b> | <b>v35</b> | <b>Predicted</b> |
|------------|------------|------------|------------|------------|------------------|
| 0          | 0          | 18.74      | 49.35      | 5.17       | 0.0001           |
| 1          | 0          | 18.74      | 49.35      | 5.17       | 0.0001           |
| 2          | 0          | 18.74      | 49.35      | 5.17       | 0.0001           |
| 3          | 0          | 18.74      | 49.35      | 5.17       | 0.0001           |
| 4          | 0          | 18.74      | 49.35      | 5.17       | 0.0001           |
| 5          | 0          | 18.74      | 49.35      | 5.17       | 0.0001           |
| 6          | 0          | 18.74      | 49.35      | 5.17       | 0.0001           |
| 7          | 0          | 18.74      | 49.35      | 5.17       | 0.0001           |
| 8          | 0          | 18.74      | 49.35      | 5.17       | 0.0001           |
| 9          | 0          | 18.74      | 49.35      | 5.17       | 0.0001           |
| 10         | 0          | 18.74      | 49.35      | 5.17       | 0.0001           |
| 11         | 0          | 18.74      | 49.35      | 5.17       | 0.0001           |
| 12         | 0          | 18.74      | 49.35      | 5.17       | 0.0001           |
| 13         | 0          | 18.74      | 49.35      | 5.17       | 0.0001           |
| 14         | 0          | 18.74      | 49.35      | 5.17       | 0.0001           |
| 15         | 0          | 18.74      | 49.35      | 5.17       | 0.0001           |
| 16         | 0          | 18.74      | 49.35      | 5.17       | 0.0001           |
| 17         | 0          | 18.74      | 49.35      | 5.17       | 0.0001           |
| 18         | 0          | 18.74      | 49.35      | 5.17       | 0.0001           |
| 19         | 0          | 18.74      | 49.35      | 5.17       | 0.0001           |
| 20         | 0          | 18.74      | 49.35      | 5.17       | 0.0001           |
| 21         | 0          | 18.74      | 49.35      | 5.17       | 0.0001           |
| 22         | 0          | 18.74      | 49.35      | 5.17       | 0.0001           |
| 23         | 0          | 18.74      | 49.35      | 5.17       | 0.0001           |
| 24         | 0          | 18.74      | 49.35      | 5.17       | 0.0001           |
| 25         | 0          | 18.74      | 49.35      | 5.17       | 0.0001           |
| 26         | 0          | 18.74      | 49.35      | 5.17       | 0.0001           |
| 27         | 0          | 18.74      | 49.35      | 5.17       | 0.0001           |
| 28         | 0          | 18.74      | 49.35      | 5.17       | 0.0001           |
| 29         | 0          | 18.74      | 49.35      | 5.17       | 0.0001           |
| 30         | 0          | 18.74      | 49.35      | 5.17       | 0.0001           |
| 31         | 0          | 18.74      | 49.35      | 5.17       | 0.0001           |
| 32         | 0          | 18.74      | 49.35      | 5.17       | 0.0001           |
| 33         | 0          | 18.74      | 49.35      | 5.17       | 0.0001           |
| 34         | 0          | 18.74      | 49.35      | 5.17       | 0.0001           |
| 35         | 0          | 18.74      | 49.35      | 5.17       | 0.0001           |
| 36         | 0          | 18.74      | 49.35      | 5.17       | 0.0001           |
| 37         | 0          | 18.74      | 49.35      | 5.17       | 0.0001           |
| 38         | 0          | 18.74      | 49.35      | 5.17       | 0.0001           |
| 39         | 0          | 18.74      | 49.35      | 5.17       | 0.0001           |
| 40         | 0          | 18.74      | 49.35      | 5.17       | 0.0001           |
| 41         | 0          | 18.74      | 49.35      | 5.17       | 0.0001           |
| 42         | 0          | 18.74      | 49.35      | 5.17       | 0.0001           |

medRxiv preprint doi: <https://doi.org/10.1101/2022.11.03.22281901>; this version posted November 4, 2022. The copyright holder for this preprint (which was not certified by peer review) is the author/funder, who has granted medRxiv a license to display the preprint in perpetuity. It is made available under a [CC-BY 4.0 International license](https://creativecommons.org/licenses/by/4.0/).



|    |   |       |       |      |        |
|----|---|-------|-------|------|--------|
| 43 | 0 | 18.74 | 49.35 | 5.17 | 0.0001 |
| 44 | 0 | 18.74 | 49.35 | 5.17 | 0.0001 |
| 45 | 0 | 18.74 | 49.35 | 5.17 | 0.0001 |
| 46 | 0 | 18.74 | 49.35 | 5.17 | 0.0001 |
| 47 | 0 | 18.74 | 49.35 | 5.17 | 0.0001 |
| 48 | 0 | 18.74 | 49.35 | 5.17 | 0.0001 |
| 49 | 0 | 18.74 | 49.35 | 5.17 | 0.0001 |
| 50 | 0 | 18.74 | 49.35 | 5.17 | 0.0001 |
| 51 | 0 | 18.74 | 49.35 | 5.17 | 0.0001 |
| 52 | 0 | 18.74 | 49.35 | 5.17 | 0.0001 |
| 53 | 0 | 18.74 | 49.35 | 5.17 | 0.0001 |
| 54 | 0 | 18.74 | 49.35 | 5.17 | 0.0001 |
| 55 | 0 | 18.74 | 49.35 | 5.17 | 0.0001 |
| 56 | 0 | 18.74 | 49.35 | 5.17 | 0.0001 |
| 57 | 0 | 18.74 | 49.35 | 5.17 | 0.0001 |
| 58 | 0 | 18.74 | 49.35 | 5.17 | 0.0001 |
| 59 | 0 | 18.74 | 49.35 | 5.17 | 0.0001 |
| 60 | 0 | 18.74 | 49.35 | 5.17 | 0.0001 |
| 61 | 0 | 18.74 | 49.35 | 5.17 | 0.0001 |
| 62 | 0 | 18.74 | 49.35 | 5.17 | 0.0001 |
| 63 | 0 | 18.74 | 49.35 | 5.17 | 0.0001 |
| 64 | 0 | 18.74 | 49.35 | 5.17 | 0.0001 |
| 65 | 0 | 18.74 | 49.35 | 5.17 | 0.0001 |
| 66 | 0 | 18.74 | 49.35 | 5.17 | 0.0001 |
| 67 | 0 | 18.74 | 49.35 | 5.17 | 0.0001 |
| 68 | 0 | 18.74 | 49.35 | 5.17 | 0.0001 |
| 69 | 0 | 18.74 | 49.35 | 5.17 | 0.0001 |
| 70 | 0 | 18.74 | 49.35 | 5.17 | 0.0001 |
| 71 | 0 | 18.74 | 49.35 | 5.17 | 0.0001 |
| 72 | 0 | 18.74 | 49.35 | 5.17 | 0.0000 |
| 73 | 0 | 18.74 | 49.35 | 5.17 | 0.0000 |
| 74 | 0 | 18.74 | 49.35 | 5.17 | 0.0000 |
| 75 | 0 | 18.74 | 49.35 | 5.17 | 0.0000 |
| 76 | 0 | 18.74 | 49.35 | 5.17 | 0.0000 |
| 77 | 0 | 18.74 | 49.35 | 5.17 | 0.0000 |
| 78 | 0 | 18.74 | 49.35 | 5.17 | 0.0000 |
| 79 | 0 | 18.74 | 49.35 | 5.17 | 0.0000 |
| 80 | 0 | 18.74 | 49.35 | 5.17 | 0.0000 |
| 81 | 0 | 18.74 | 49.35 | 5.17 | 0.0000 |
| 82 | 0 | 18.74 | 49.35 | 5.17 | 0.0000 |
| 83 | 0 | 18.74 | 49.35 | 5.17 | 0.0000 |
| 84 | 0 | 18.74 | 49.35 | 5.17 | 0.0000 |
| 85 | 0 | 18.74 | 49.35 | 5.17 | 0.0000 |
| 86 | 0 | 18.74 | 49.35 | 5.17 | 0.0000 |
| 87 | 0 | 18.74 | 49.35 | 5.17 | 0.0000 |

medRxiv preprint doi: <https://doi.org/10.1101/2022.11.03.22281901>; this version posted November 4, 2022. The copyright holder for this preprint (which was not certified by peer review) is the author/funder, who has granted medRxiv a license to display the preprint in perpetuity. It is made available under a [CC-BY 4.0 International license](https://creativecommons.org/licenses/by/4.0/).

|    |   |       |       |      |        |
|----|---|-------|-------|------|--------|
| 88 | 0 | 18.74 | 49.35 | 5.17 | 0.0000 |
| 89 | 0 | 18.74 | 49.35 | 5.17 | 0.0000 |
| 90 | 0 | 18.74 | 49.35 | 5.17 | 0.0000 |
| 91 | 0 | 18.74 | 49.35 | 5.17 | 0.0000 |
| 92 | 0 | 18.74 | 49.35 | 5.17 | 0.0000 |
| 93 | 0 | 18.74 | 49.35 | 5.17 | 0.0000 |
| 94 | 0 | 18.74 | 49.35 | 5.17 | 0.0000 |
| 95 | 0 | 18.74 | 49.35 | 5.17 | 0.0000 |
| 96 | 0 | 18.74 | 49.35 | 5.17 | 0.0000 |
| 97 | 0 | 18.74 | 49.35 | 5.17 | 0.0000 |
| 98 | 0 | 18.74 | 49.35 | 5.17 | 0.0000 |

medRxiv preprint doi: <https://doi.org/10.1101/2022.11.03.22281901>; this version posted November 4, 2022. The copyright holder for this preprint (which was not certified by peer review) is the author/funder, who has granted medRxiv a license to display the preprint in perpetuity.  
It is made available under a [CC-BY 4.0 International license](https://creativecommons.org/licenses/by/4.0/) .
